# Supplementary material for: Comparative transcriptomic profiling of hydrogen peroxide signaling networks in zebrafish and human keratinocytes: Implications toward conservation, migration and wound healing
Source: PubMed Central journal article supplement (PMC4742856; doi:10.1038/srep20328), 2016-02-05
Supplement: srep20328-s1.pdf [file srep20328-s1.pdf]

Table S1. Top and Bottom 10 most up- and down-regulated statistically significant transcripts (H<sub>2</sub>O<sub>2</sub> vs. untreated zebrafish larvae)

| Up-regulated   |           |       |         |                                                                                       |                                                                                                                                               |
|----------------|-----------|-------|---------|---------------------------------------------------------------------------------------|-----------------------------------------------------------------------------------------------------------------------------------------------|
| Rank           | Symbol    | logFC | P-value | Description                                                                           | GO Slim (summary)                                                                                                                             |
| 1              | hsp70l    | 2.6   | 0.030   | heat shock cognate 70-kd protein, like                                                | cell morphogenesis; anatomical structure development; cell cycle; ion binding; response to stress                                             |
| 2              | mcm5      | 2.5   | 0.004   | MCM5 minichromosome maintenance deficient 5                                           | cell morphogenesis; anatomical structure development; cell cycle                                                                              |
| 3              | mmp9      | 2.2   | 0.007   | matrix metalloproteinase 9                                                            | peptidase activity; ion binding                                                                                                               |
| 4              | mmp13a    | 1.9   | 0.025   | matrix metalloproteinase 13a                                                          | peptidase activity; ion binding; cell motility; locomotion; anatomical structure development; embryo development                              |
| 5              | cyp24a1   | 1.8   | 0.038   | cytochrome P450, family 24, subfamily A, polypeptide 1                                | oxidoreductase activity; ion binding                                                                                                          |
| 6              | fosl1a    | 1.7   | 0.016   | FOS-like antigen 1a                                                                   | nucleic acid binding transcription factor activity; nucleus                                                                                   |
| 7              | cyp1a     | 1.7   | 0.030   | cytochrome P450, family 1, subfamily A                                                | oxidoreductase activity; ion binding                                                                                                          |
| 8              | cry5      | 1.7   | 0.033   | cryptochrome 5                                                                        | lyase activity; cellular nitrogen compound metabolic process; response to stress; DNA metabolic process                                       |
| 9              | plek2     | 1.5   | 0.007   | pleckstrin 2                                                                          | lipid binding; signal transduction; ion binding                                                                                               |
| 10             | per2      | 1.4   | 0.006   | period homolog 2                                                                      | signal transduction; response to stress                                                                                                       |
| Down-regulated |           |       |         |                                                                                       |                                                                                                                                               |
| Rank           | Symbol    | logFC | Pvalue  | Description                                                                           | GO Slim (summary)                                                                                                                             |
| 1              | npas4a    | -2.2  | 0.047   | neuronal PAS domain protein 4a                                                        | DNA binding; signal transduction; organelle; nucleus; biosynthetic process; cell; intracellular; cellular nitrogen compound metabolic process |
| 2              | plekhf1   | -1.8  | 0.044   | pleckstrin homology domain containing, family F                                       | lipid binding; ion binding                                                                                                                    |
| 3              | serpinh1b | -1.6  | 0.027   | serpin peptidase inhibitor, clade H, member 1b                                        | enzyme regulator activity; cytoplasm; response to stress                                                                                      |
| 4              | EGR4      | -1.5  | 0.045   | early growth response 4                                                               | ion binding                                                                                                                                   |
| 5              | nfkbiaa   | -1.4  | 0.042   | nuclear factor of kappa light polypeptide gene enhancer in B-cells inhibitor, alpha a | DNA binding, inhibitor of NF-κB                                                                                                               |
| 6              | lrata     | -1.2  | 0.008   | lecithin retinol acyltransferase a                                                    | NA                                                                                                                                            |
| 7              | fabp11b   | -1.2  | 0.019   | fatty acid binding protein 11b                                                        | lipid binding; transport                                                                                                                      |
| 8              | GPR3      | -1.1  | 0.007   | G protein-coupled receptor 3                                                          | signal transduction                                                                                                                           |
| 9              | noxo1a    | -1.1  | 0.017   | NADPH oxidase organizer 1a                                                            | lipid binding; ion binding                                                                                                                    |
| 10             | elf3      | -1.1  | 0.022   | E74-like factor 3                                                                     | nucleic acid binding transcription factor activity; nucleus                                                                                   |

Table S2. Functional annotation (Enriched Pathways) of RNA-seq data: Up-regulated differentially regulated gene set of H<sub>2</sub>O<sub>2</sub> vs. untreated larval zebrafish

| <b>Up-regulated Gene Set</b>                             |                |                    |
|----------------------------------------------------------|----------------|--------------------|
| <b>IPA Category and Predicted Activation</b>             | <b>p-Value</b> | <b># Molecules</b> |
| Cellular Growth and Proliferation                        | 1.25E-05       | 105                |
| Cell Death and Survival                                  | 1.11E-05       | 84                 |
| Organismal Survival (↓death)                             | 5.54E-04       | 76                 |
| Gene Expression                                          | 5.79E-07       | 75                 |
| Cellular Development (↑differentiation)                  | 8.01E-06       | 66                 |
| Tissue Morphology (↑cell quantity)                       | 5.39E-05       | 56                 |
| Molecular Transport                                      | 9.67E-03       | 46                 |
| Cell Death and Survival (↑survival)                      | 9.31E-04       | 45                 |
| Cellular Function and Maintenance (↑homeostasis)         | 1.14E-03       | 43                 |
| Cell Death and Survival (↑viability)                     | 1.11E-03       | 42                 |
| Small Molecule Biochemistry (lipid amount)               | 2.63E-05       | 35                 |
| Lipid Metabolism (↑synthesis)                            | 3.28E-05       | 32                 |
| Organismal Development (↑size)                           | 7.99E-03       | 31                 |
| Gene Expression (transactivation)                        | 8.92E-06       | 30                 |
| Cellular Development (↑connective tissue diff.)          | 4.03E-06       | 28                 |
| Cellular Movement                                        | 7.72E-03       | 24                 |
| Immune Cell Trafficking                                  | 7.72E-03       | 24                 |
| Tissue Morphology (connective tissue)                    | 2.04E-04       | 23                 |
| Digestive System Development and Function                | 2.42E-03       | 23                 |
| Cellular Development (prolif. immune cells)              | 4.38E-03       | 23                 |
| Molecular Transport (steroids)                           | 5.31E-05       | 22                 |
| Cellular Movement (↑invasion)                            | 1.50E-03       | 22                 |
| Lipid Metabolism (fatty acids)                           | 1.57E-03       | 21                 |
| Embryonic Development (↑abdomen)                         | 5.31E-03       | 20                 |
| Hematological System Development (↑cell movement)        | 4.70E-03       | 17                 |
| Organ Morphology (skin)                                  | 3.21E-04       | 14                 |
| Vitamin and Mineral Metabolism (↑terpenoid)              | 6.30E-04       | 14                 |
| Cell Signaling                                           | 4.32E-04       | 14                 |
| Vitamin and Mineral Metabolism (↑steroids)               | 7.55E-04       | 13                 |
| Free Radical Scavenging                                  | 1.18E-04       | 11                 |
| Hair and Skin Development and Function (epidermal cells) | 1.27E-03       | 9                  |
| Connective Tissue Development and Function (fibroblasts) | 1.02E-02       | 8                  |
| Cellular Movement (fibroblasts)                          | 1.07E-02       | 8                  |
| Hepatic System Development (regeneration)                | 6.05E-05       | 7                  |
| Organismal Injury (↓glomerulonephritis)                  | 8.18E-03       | 7                  |
| Hair and Skin Development (keratinocytes)                | 1.24E-02       | 7                  |
| Vitamin and Mineral Metabolism (quantity)                | 2.22E-03       | 6                  |
| Antimicrobial Response                                   | 2.88E-03       | 6                  |
| Immune Cell Trafficking (lymphocytes)                    | 5.01E-03       | 6                  |
| Tissue Development (adhesion)                            | 1.37E-02       | 5                  |
| Vitamin and Mineral Metabolism (alitretinoin)            | 1.09E-02       | 2                  |

Note: Predicted direction (activation/deactivation) shown by arrows; Table corresponds to Worksheet 2.

Table S3. Functional annotation (Enriched Pathways) of RNA-seq data: Down-regulated differentially regulated gene set of H<sub>2</sub>O<sub>2</sub> vs. untreated larval zebrafish

| <b>Down-regulated Gene Set</b>                                 |                |                    |
|----------------------------------------------------------------|----------------|--------------------|
| <b>IPA Category and Predicted Activation</b>                   | <b>p-Value</b> | <b># Molecules</b> |
| Inflammatory Response                                          | 3.34E-02       | 21                 |
| Cellular Compromise (ER stress)                                | 1.51E-06       | 10                 |
| Organ Morphology (abnormal morphology of gland)                | 3.03E-02       | 9                  |
| Molecular Transport                                            | 2.82E-02       | 7                  |
| Organ Morphology (exocrine cells)                              | 2.82E-05       | 6                  |
| Organismal Injury (↑oligozoospermia)                           | 4.63E-03       | 6                  |
| Cell Morphology (abnormal morphology of epithelial cells)      | 5.16E-03       | 6                  |
| DNA Replication, Recombination, and Repair                     | 2.74E-02       | 6                  |
| Tissue Morphology (abnormal glandular epithelium)              | 1.55E-04       | 5                  |
| Tissue Development (organization of ECM)                       | 7.08E-03       | 5                  |
| Inflammatory Response (antigen presenting cells)               | 2.54E-02       | 5                  |
| Cellular Function and Maintenance (phagocytosis)               | 1.28E-02       | 4                  |
| Cell Death and Survival (B lymphocytes)                        | 2.19E-02       | 4                  |
| Protein Folding                                                | 3.11E-02       | 4                  |
| Small Molecule Biochemistry (cholesterol hydroxylation)        | 2.94E-03       | 2                  |
| Visual System Development and Function (abnormal morphology)   | 1.02E-04       | 3                  |
| Free Radical Scavenging (induction of ROS)                     | 1.79E-02       | 2                  |
| Post-Translational Modification (refolding)                    | 1.79E-02       | 2                  |
| Lipid Metabolism (catabolism of steroid)                       | 2.42E-02       | 2                  |
| Cell-To-Cell Signaling (disruption of intercellular junctions) | 2.42E-02       | 2                  |
| Free Radical Scavenging (metabolism of superoxide)             | 3.11E-02       | 2                  |

Note: Predicted direction (activation/deactivation) shown by arrows; Table corresponds to Worksheet 2.

Table S4: Primers

| Up-regulated genes |                           | Zebrafish (RT-PCR)                                |                |
|--------------------|---------------------------|---------------------------------------------------|----------------|
| primer ID          | primer sequence           | gene name                                         | product length |
| junbb_fwd          | AGTCGGAGCCTCCCATTAC       | Jun B proto-oncogene                              | 400bp          |
| junbb_rev          | AGAACAGACGCTGTGTTGGA      |                                                   |                |
| xpc_ex8_fwd        | ATGGAGCCGTGAAAATATGC      | Xeroderma pigmentosum                             | 396bp          |
| xpc_ex8_rev        | TAGTCTCCTCCCACCACTCG      |                                                   |                |
| scd_ex6_fwd        | CCACACGTTTCCCTACGACT      | Stearoyl-Desaturase                               | 397bp          |
| scd_ex6_rev        | GAGAAGAGGAAGCCGAAAC       |                                                   |                |
| cyp1a_ex2_fwd      | GTCCTGGAAATCGGAAACAA      | Cytochrome P450 Family 1, Subfamily A polypeptide | 398bp          |
| cyp1a_ex2_rev      | AGCTTCCATCGGCTTTCATA      |                                                   |                |
| sqstm1_ex3_fwd     | TCACTTTAGCCCTCCTGGTC      | Sequestosome 1                                    | 396bp          |
| sqstm1_ex3_rev     | CCCACATGCAGTGTCTCATC      |                                                   |                |
| odc1_ex2_fwd       | CGCGGTTTACCACAGCTACT      | Ornithine Decarboxylase                           | 402bp          |
| odc1_ex3_rev       | CAGGAAGGCGAAGTCAAAGT      |                                                   |                |
| mmp13a_ex2_fwd     | AATTACCTGACTCGACTGTATGG   | Matrix Metalloproteinase 13a                      | 404bp          |
| mmp13a_ex3_rev     | CCAGTGCGGAAGAAGATCA       |                                                   |                |
| apold1_ex14_fwd    | CATCATCATCTCTGCCATCG      | Apolipoprotein L domain containing 1              | 395bp          |
| apold1_ex15_rev    | AGCCCTTCTTCACCTCCTTC      |                                                   |                |
| plek2_ex9_fwd      | ATCGCTCTCTGAATGGCACT      | Pleckstrin 2                                      | 392bp          |
| plek2_ex9_rev      | TGCATTCAGATTAACGCACA      |                                                   |                |
| fosl1a_ex1_fwd     | TTTTTATTTTATTCTACCGCTGTCA | Fos-like antigen 1                                | 390bp          |
| fosl1a_ex1_rev     | CTGTTGTTGTTGGGTTGTGC      |                                                   |                |
| egfr_ex1_fwd       | AACGGATTCCAGTTTTTCC       | Epidermal growth factor receptor                  | 400bp          |
| egfr_ex4_rev       | GTCTGGGTTATCCAGGTTGG      |                                                   |                |
| mknk1_ex14_fwd     | GTCTGCTCCATGAGGCTTTC      | MAPK-interacting serine/threonine kinase 1        | 398bp          |
| mknk1_ex14_rev     | TAAAAGCGATGCGAATGTCA      |                                                   |                |
| junba_fwd          | TCACACCTGCAGCCAACTAC      | Jun a proto-oncogene                              | 400bp          |
| junba_rev          | TGAGCTACCTGCTCCCTCAG      |                                                   |                |
| epha2_ex3_fwd      | TGGTGAACGGCTCTCTTCTT      | Ephrin Type-A Receptor 2 (transcript 1)           | 403bp          |

|                             |                          |                                                        |                       |
|-----------------------------|--------------------------|--------------------------------------------------------|-----------------------|
| epha2_ex3_rev               | GCCACACAGCCTCCTAAATC     |                                                        |                       |
| cyp24a1_fwd                 | AAAAGTCAACGGCAAAATGG     | Cytochrome P450, family 24, subfamily A, polypeptide 1 | 384bp                 |
| cyp24a1_rev                 | TCTGTTGTGGCAGCGTAAAG     |                                                        |                       |
| gadd45bb_fwd                | CTGCACAGCGACAAAACCTGT    | Growth arrest and DNA-damage-inducible, beta b         | 372bp                 |
| gadd45bb_rev                | TAGAAGGCACCCACTGGTTC     |                                                        |                       |
| socs3b_fwd                  | CTCGGACCATCACCCTTCT      | Suppressor of cytokine signaling 3b                    | 396bp                 |
| socs3b_rev                  | ATGGGAGCATCGTACTCCTG     |                                                        |                       |
| hmox1a_fwd                  | GGAAGAGCTGGACAGAAACG     | Heme oxygenase (decycling) 1a                          | 405bp                 |
| hmox1a_rev                  | TCCTGCCTCTTTTGCTCTGT     |                                                        |                       |
| hsp70l_fwd                  | GGCACCACCTACTCCTGTGT     | Heat shock cognate 70-kd protein, like                 | 386bp                 |
| hsp70l_rev                  | GTCACCTTCTGCCCCAGATA     |                                                        |                       |
| mmp-9_ex4_fwd               | CTCACGCTTATCCTCCAGGT     | Matrix metalloproteinase 9                             | 402bp                 |
| mmp-9_ex6_rev               | TTGAAAAACAAAATGGTGAAGAAA |                                                        |                       |
| foxo1a_fwd                  | GCAGAATGAGGGGACTGGTA     | Forkhead box O1 a                                      | 390bp                 |
| foxo1a_rev                  | GAGGTCATTTTGGTCCCTGA     |                                                        |                       |
| il6st_fwd                   | CACATCATTGGCTGTTGGTC     | Interleukin 6 signal transducer                        | 383bp                 |
| il6sf_rev                   | TGGTTTCATCGGAGGGTATC     |                                                        |                       |
| vsig-10_fwd                 | AACCCGTCAGTGCATCTTTC     | V-set and immunoglobulin domain containing 10          | 384bp                 |
| vsid-10_rev                 | CCCTTGATCTAGTGGCTGGA     |                                                        |                       |
| iitga11a_fwd                | CCAACAACACATTGCTGGAG     | Integrin, alpha 11a                                    | 394bp                 |
| iitga11a_rev                | TGAACCGTCCAAGACAATCA     |                                                        |                       |
| ltgb4_fwd                   | ATTGCTGAGCTGGGACAGTT     | Integrin, beta 4                                       | 416bp                 |
| ltgb4_rev                   | TTCCACAGACCAGATCTCC      |                                                        |                       |
|                             |                          |                                                        |                       |
| <b>Down-regulated genes</b> |                          |                                                        |                       |
|                             |                          | <b>Zebrafish (RT-PCR)</b>                              |                       |
| <b>primer ID</b>            | <b>primer sequence</b>   | <b>gene name</b>                                       | <b>product length</b> |
| cnot7_ex3_fwd               | GTAGCGAGACCAATCGGAGA     | CCR4-NOT transcription complex, subunit 7              | 400bp                 |
| cnot7_ex5_rev               | CGACCTCTTCATCTGGCAAC     |                                                        |                       |
| elf3_ex3_fwd                | AAACCTGAGCGGCTATTCTTC    | E74-like factor 3 (ets-domain TF, epithelia-specific)  | 402bp                 |
| elf3_ex4_fwd                | TGGAGGGAAATGAGTTCTGC     |                                                        |                       |

|                 |                       |                                                                                       |       |
|-----------------|-----------------------|---------------------------------------------------------------------------------------|-------|
| klf4a_ex2_fwd   | TTCTCCATCAGGAGGTTTCG  | Kruppel-like factor 4                                                                 | 404bp |
| klf4a_ex2_rev   | CCTGCGGAAATCCAGAATAA  |                                                                                       |       |
| mc1r_fwd        | TGGCAATCATCAAGAACAGG  | Melanocortin 1 receptor                                                               | 401bp |
| mc1r_rev        | AGTCACGAGACAGGCGATG   |                                                                                       |       |
| npas4a_ex7_fwd  | GAAGCCTCACCTGGAAAACA  | Neuronal PAS domain 4                                                                 | 401bp |
| npas4a_ex7_rev  | TCAGGAGTGGAGGGAGAAGA  |                                                                                       |       |
| itpkb_ex2_fwd   | GTTCAACATTCAGCCCACCT  | Inositol-trisphosphate 3-kinase B                                                     | 400bp |
| itpkb_ex2_rev   | GTAAGTTGGACAGGGGCAAA  |                                                                                       |       |
| cngb3_ex6_fwd   | CTCCACCTCAACGCTTGTCT  | Cyclic nucleotide gated channel beta 3                                                | 390bp |
| cngb3_ex8_rev   | CAACATGCCCTGGGAGTC    |                                                                                       |       |
| tnfb_ex2_fwd    | GAAGGTCAGAAACCCAACAGA | TNF superfamily, member 2                                                             | 401bp |
| tnfb_ex2_rev    | CAAAACCCAATGTTGGATCA  |                                                                                       |       |
| nfkbiaa_ex1_fwd | TCTCTCGGGCTTCACTTGTT  | Nuclear factor of kappa light polypeptide gene enhancer in B-cells inhibitor, alpha a | 396bp |
| nfkbiaa_ex2_rev | GTCGTTCTGGCACTGTTTGA  |                                                                                       |       |
| ftr53_ex4_fwd   | ATCAGCACCCCTTGAAATTG  | FinTRIM family, member 53                                                             | 401bp |
| ftr53_ex6_rev   | ACACACCATAAGGCCCACTC  |                                                                                       |       |
| egr_ex2_fwd     | ACCTACACCGGCAGCTTCTA  | Early growth response 4                                                               | 396bp |
| egr_ex2_rev     | CTGCTTGATCCAAGTGTCCA  |                                                                                       |       |
|                 |                       |                                                                                       |       |

Table S5. Uncharacterized differentially regulated protein-coding transcripts and lincRNA (H<sub>2</sub>O<sub>2</sub> vs. untreated zebrafish larvae)

| Gene              | Homologous to:                                                                               | Chr | Begin    | End      | logFC | P    | Ensembl Gene ID    |
|-------------------|----------------------------------------------------------------------------------------------|-----|----------|----------|-------|------|--------------------|
| BX005175.1        | IKNASE C TYPE EC_2.7.11.13<br>NPKC                                                           | 11  | 18765417 | 18789668 | 0.49  | 0.02 | ENSDARG00000070651 |
| BX248582.1        | UNKNOWN                                                                                      | 15  | 663267   | 668300   | -0.65 | 0.04 | ENSDARG00000009402 |
| BX323045.3        | CTD SMALL PHOSPHATASE                                                                        | 11  | 5851978  | 5870846  | 0.49  | 0.03 | ENSDARG00000089646 |
| BX323819.1        | ADENYLATE CYCLASE TYPE<br>EC_4.6.1.1                                                         | 17  | 33519383 | 33544148 | -0.64 | 0.03 | ENSDARG00000043141 |
| BX548011.3        | UNKNOWN                                                                                      | 4   | 49787861 | 49789795 | 1.30  | 0.01 | ENSDARG00000087506 |
| BX664721.5        | UNKNOWN                                                                                      | 7   | 76692360 | 76699575 | -0.53 | 0.03 | ENSDARG00000090371 |
| BX908793.1        | RHO GTPASE ACTIVATING                                                                        | 3   | 22599643 | 22634992 | -0.57 | 0.01 | ENSDARG00000061798 |
| BX927362.1        | SYNTHASE                                                                                     | 6   | 43369376 | 43380209 | 0.98  | 0.00 | ENSDARG00000087873 |
| BX927369.2        | UNKNOWN                                                                                      | 17  | 49675395 | 49685460 | -0.82 | 0.01 | ENSDARG00000070652 |
| BX957278.1        | UNKNOWN                                                                                      | 7   | 20975567 | 20983342 | 1.51  | 0.00 | ENSDARG00000010940 |
| CABZ01007794.1    | UNKNOWN                                                                                      | 7   | 2637136  | 2654723  | 1.03  | 0.00 | ENSDARG00000088655 |
| CABZ01020840.1    | UNKNOWN                                                                                      | 4   | 4474961  | 4485224  | 0.82  | 0.01 | ENSDARG00000090401 |
| CABZ01024770.1    | ARF GAP WITH RHO GAP DOMAIN<br>ANK REPEAT<br>AND PH DOMAIN CONTAINING<br>CENTAURIN DELTA CNT | 21  | 42585816 | 42628903 | 0.64  | 0.01 | ENSDARG00000087492 |
| CABZ01041493.1    | UNKNOWN                                                                                      | 18  | 45219884 | 45238864 | 0.46  | 0.02 | ENSDARG00000088409 |
| CABZ01041812.1    | FERRIC CHELATE REDUCTASE<br>STROMAL CELL DERIVED<br>RECEPTOR 2 SDR 2                         | 24  | 30741886 | 30760340 | 1.51  | 0.00 | ENSDARG00000061481 |
| CABZ01067072.1    | IMMUNOGLOBULIN SUPERFAMILY<br>MEMBER<br>3 PRECURSOR IGSF3                                    | 9   | 520131   | 534160   | 0.68  | 0.02 | ENSDARG00000086721 |
| CABZ01072534.1    | UNKNOWN                                                                                      | 1   | 41080395 | 41120369 | -0.64 | 0.03 | ENSDARG00000075951 |
| CABZ01076094.1    | COLLAGEN ALPHA 1 IX CHAIN                                                                    | 19  | 4505333  | 4541542  | 0.59  | 0.04 | ENSDARG00000039462 |
| CABZ01076801.1    | KINESIN                                                                                      | 20  | 47775841 | 47801501 | -0.43 | 0.04 | ENSDARG00000017162 |
| CABZ01080370.1    | POU DOMAIN CLASS 2<br>TRANSCRIPTION<br>FACTOR OCTAMER                                        | 1   | 628783   | 640887   | 0.74  | 0.00 | ENSDARG00000043682 |
| CABZ01084007.1    | CENTROSOMAL OF 120 KDA<br>CEP120<br>COILED COIL DOMAIN<br>CONTAINING 100                     | 8   | 88184    | 136657   | 0.46  | 0.03 | ENSDARG00000091326 |
| CABZ01084952.1    | UNKNOWN                                                                                      | 2   | 73298    | 80311    | 0.62  | 0.05 | ENSDARG00000086333 |
| CABZ01087111.1    | MIDNOLIN MIDBRAIN NUCLEOLAR                                                                  | 16  | 52537808 | 52544134 | 1.55  | 0.00 | ENSDARG00000087923 |
| CR391977.3        | UNKNOWN                                                                                      | 25  | 27621529 | 27624918 | -0.44 | 0.04 | ENSDARG00000090185 |
| CR391986.1        | UNKNOWN                                                                                      | 17  | 24745510 | 24765397 | 0.96  | 0.00 | ENSDARG00000078130 |
| CR391991.1        | PERIOD CIRCADIAN HOMOLOG<br>CIRCADIAN                                                        | 2   | 48911934 | 48912326 | 1.61  | 0.00 | ENSDARG00000078099 |
| CT027835.1        | ARYL HYDROCARBON<br>INTERACTING                                                              | 14  | 42351111 | 42369582 | -0.67 | 0.02 | ENSDARG00000014095 |
| CU074314.1        | RHO GUANINE NUCLEOTIDE<br>EXCHANGE FACTOR 37                                                 | 14  | 25848223 | 25872579 | 0.56  | 0.02 | ENSDARG00000002463 |
| CU459072.2        | UNKNOWN                                                                                      | 17  | 50819580 | 50836315 | 0.74  | 0.02 | ENSDARG00000087251 |
| CU469311.1        | LYSYL OXIDASE HOMOLOG<br>PRECURSOR                                                           | 10  | 20441709 | 20480325 | 0.84  | 0.01 | ENSDARG00000091492 |
| CU633999.1        | COLLAGEN ALPHA 1 CHAIN                                                                       | 19  | 61882    | 82475    | 0.71  | 0.04 | ENSDARG00000076623 |
| CU638738.1        | PROTO ONCOGENE C FOS                                                                         | 17  | 50755160 | 50764033 | -0.84 | 0.00 | ENSDARG00000040135 |
| CU638740.1        | RETINOL DEHYDROGENASE                                                                        | 14  | 4329760  | 4340102  | 0.53  | 0.02 | ENSDARG00000074971 |
| CU915778.1        | VON WILLEBRAND FACTOR A<br>DOMAIN<br>CONTAINING 7 PRECURSOR                                  | 1   | 44449883 | 44467566 | -0.68 | 0.04 | ENSDARG00000086717 |
| FP236810.2        | TYROSINE PHOSPHATASE<br>AUXILIN EC_3.1.3.48<br>DNAJ HOMOLOG SUBFAMILY C<br>MEMBER 6          | 5   | 9812700  | 9823111  | 0.49  | 0.05 | ENSDARG00000090654 |
| si:ch211-132b12.7 | UNKNOWN                                                                                      | 18  | 38965706 | 38981883 | 0.88  | 0.01 | ENSDARG00000068374 |
| si:ch211-161h7.5  | UNKNOWN                                                                                      | 24  | 21518374 | 21523502 | 0.94  | 0.01 | ENSDARG00000093044 |
| si:ch211-225b11.1 | SODIUM AND CHLORIDE<br>DEPENDENT TRANSPORTER<br>SOLUTE CARRIER FAMILY 6                      | 5   | 22570100 | 22597916 | 1.06  | 0.00 | ENSDARG00000002405 |

## MEMBER

|                  |                                                        |    |          |          |       |      |                    |
|------------------|--------------------------------------------------------|----|----------|----------|-------|------|--------------------|
| si:ch211-241e1.3 | LAMININ SUBUNIT ALPHA 3<br>PRECURSOR                   | 2  | 1128112  | 1169253  | 1.47  | 0.00 | ENSDARG00000022615 |
| si:ch73-25i22.2  | UNKNOWN                                                | 18 | 5109404  | 5124138  | 1.16  | 0.00 | ENSDARG00000088549 |
| si:dkey-104n9.1  | UNKNOWN                                                | 8  | 13360832 | 13365015 | 1.40  | 0.00 | ENSDARG00000093042 |
| si:dkey-193c22.1 | UNKNOWN                                                | 5  | 41825948 | 41835577 | -0.85 | 0.01 | ENSDARG00000093687 |
| si:dkey-22f5.9   | UNKNOWN                                                | 21 | 29414118 | 29421574 | -1.10 | 0.03 | ENSDARG00000092044 |
| si:dkey-242g16.2 | UNKNOWN                                                | 10 | 18017268 | 18018999 | -0.80 | 0.01 | ENSDARG00000069377 |
| TTC17            | TETRATRICOPEPTIDE REPEAT 17                            | 7  | 51752705 | 51806323 | 0.40  | 0.03 | ENSDARG00000044812 |
| wu:fj08f03       | UNKNOWN                                                | 14 | 11649673 | 11655264 | 0.62  | 0.01 | ENSDARG00000077169 |
| zgc:101549       | SIALIC ACID SYNTHASE                                   | 25 | 5627495  | 5639284  | -0.71 | 0.01 | ENSDARG00000036009 |
| zgc:103625       | UNKNOWN                                                | 3  | 47690300 | 47695875 | -0.57 | 0.03 | ENSDARG00000038770 |
| zgc:109934       | FERRITIN HEAVY CHAIN                                   | 3  | 32255646 | 32257330 | 1.26  | 0.00 | ENSDARG00000094210 |
| zgc:112160       | CHYMOTRYPSINOGEN B<br>PRECURSOR                        | 7  | 36516809 | 36521137 | -0.83 | 0.01 | ENSDARG00000039730 |
| zgc:113054       | UNKNOWN                                                | 6  | 43381521 | 43406057 | 0.70  | 0.02 | ENSDARG00000053483 |
| zgc:158706       | UNKNOWN                                                | 21 | 9672503  | 9675872  | 1.37  | 0.00 | ENSDARG00000069988 |
| zgc:162184       | CALPAIN SUBUNIT                                        | 17 | 45821870 | 45846739 | 1.22  | 0.00 | ENSDARG00000077217 |
| zgc:172139       | UNKNOWN                                                | 4  | 60272405 | 60301556 | 0.77  | 0.01 | ENSDARG00000068830 |
| zgc:66382        | TRYPSIN PRECURSOR<br>EC_3.4.21.4                       | 16 | 28253006 | 28254288 | -1.08 | 0.01 | ENSDARG00000079274 |
| zgc:91849        | IMMUNOGLOBULIN SUPERFAMILY<br>MEMBER 2 PRECURSOR IGSF2 | 9  | 27602    | 39587    | 0.69  | 0.01 | ENSDARG00000014323 |
| si:dkeyp-86h10.3 | Family: lincRNA                                        | 16 | 22398201 | 22399884 | -0.76 | 0.04 | ENSDART00000134980 |



Table S6. Top and Bottom 40-most statistically significant differentially regulated genes (H<sub>2</sub>O<sub>2</sub> vs. untreated) from the RNA-seq larval zebrafish analysis

| Rank         | Symbol    | logFC                                        | Rank           | Symbol     | logFC                                        |
|--------------|-----------|----------------------------------------------|----------------|------------|----------------------------------------------|
|              |           | (H <sub>2</sub> O <sub>2</sub> vs Untreated) |                |            | (H <sub>2</sub> O <sub>2</sub> vs Untreated) |
| Up-regulated |           |                                              | Down-regulated |            |                                              |
| 1            | hsp70l    | 2.66                                         | 1              | npas4a     | -2.23                                        |
| 2            | mcm5      | 2.59                                         | 2              | plekhh1    | -1.84                                        |
| 3            | mmp9      | 2.30                                         | 3              | serpinh1b  | -1.67                                        |
| 4            | mmp13a    | 1.98                                         | 4              | EGR4       | -1.55                                        |
| 5            | cyp24a1   | 1.84                                         | 5              | nfkbiaa    | -1.44                                        |
| 6            | fosl1a    | 1.79                                         | 6              | lrata      | -1.28                                        |
| 7            | cyp1a     | 1.76                                         | 7              | fabp11b    | -1.24                                        |
| 8            | cry5      | 1.70                                         | 8              | GPR3       | -1.20                                        |
| 9            | plek2     | 1.59                                         | 9              | noxo1a     | -1.19                                        |
| 10           | per2      | 1.43                                         | 10             | elf3       | -1.18                                        |
| 11           | wdr76     | 1.43                                         | 11             | kcnj1a.5   | -1.17                                        |
| 12           | cbx7a     | 1.35                                         | 12             | cnot7      | -1.13                                        |
| 13           | cry-dash  | 1.33                                         | 13             | kcnj1a.3   | -1.12                                        |
| 14           | igfbp1a   | 1.29                                         | 14             | cyr61      | -1.11                                        |
| 15           | sqstm1    | 1.25                                         | 15             | CHORDC1    | -1.10                                        |
| 16           | ctssb.1   | 1.20                                         | 16             | kcnj1a.4   | -1.05                                        |
| 17           | dnajb1b   | 1.20                                         | 17             | guca1c     | -1.03                                        |
| 18           | cebpb     | 1.16                                         | 18             | cry2a      | -1.01                                        |
| 19           | itgb4     | 1.15                                         | 19             | ca4b       | -1.01                                        |
| 20           | bach1     | 1.13                                         | 20             | dnaja1l    | -0.97                                        |
| 21           | junbb     | 1.10                                         | 21             | grk1b      | -0.97                                        |
| 22           | abhd4     | 1.10                                         | 22             | aldh3b2    | -0.96                                        |
| 23           | hsd17b12a | 1.09                                         | 23             | jund       | -0.95                                        |
| 24           | APOLD1    | 1.08                                         | 24             | CNGB3      | -0.95                                        |
| 25           | bcl6ab    | 1.06                                         | 25             | RGS9BP     | -0.95                                        |
| 26           | keap1a    | 1.06                                         | 26             | muc13a     | -0.94                                        |
| 27           | junba     | 1.06                                         | 27             | IMPG2      | -0.94                                        |
| 28           | hebp2     | 1.05                                         | 28             | CINP       | -0.91                                        |
| 29           | pck1      | 1.04                                         | 29             | ace2       | -0.90                                        |
| 30           | abcb6a    | 1.03                                         | 30             | obfc1      | -0.86                                        |
| 31           | grhl3     | 1.02                                         | 31             | kcnj1a.1   | -0.84                                        |
| 32           | itga6b    | 1.00                                         | 32             | glmnb      | -0.82                                        |
| 33           | scd       | 0.98                                         | 33             | znf532     | -0.82                                        |
| 34           | vtg7      | 0.94                                         | 34             | mettl7a    | -0.81                                        |
| 35           | egln3     | 0.92                                         | 35             | eif3bb     | -0.81                                        |
| 36           | lsm10     | 0.91                                         | 36             | imp1a      | -0.79                                        |
| 37           | irg1l     | 0.89                                         | 37             | ugt5d1     | -0.78                                        |
| 38           | AP1M2     | 0.89                                         | 38             | hsp90aa1.2 | -0.78                                        |
| 39           | LDLR      | 0.87                                         | 39             | kcnj1a.6   | -0.78                                        |
| 40           | lonrf1    | 0.86                                         | 40             | rbm4.1     | -0.77                                        |

FDR≤0.1

Table S7. Validation of RNAseq vs. qPCR

| Gene     | logFC RNAseq | logFC qPCR |
|----------|--------------|------------|
| eph2     | 0.67         | 0.55       |
| junba    | 1.11         | 0.83       |
| mknk1    | 0.68         | 0.37       |
| odc1     | 0.72         | 0.25       |
| plek2    | 1.55         | 2.60       |
| sqstm1   | 1.32         | 0.66       |
| junbb    | 1.19         | 1.19       |
| xpc      | 0.71         | 0.64       |
| cyp1a    | 1.76         | 2.99       |
| scd      | 0.96         | 1.04       |
| mmp13a   | 2.01         | 1.53       |
| apold1   | 1.17         | 1.83       |
| junba    | 1.11         | 0.74       |
| elf3     | -1.07        | -0.94      |
| klf4a    | -0.94        | -2.00      |
| cnot7    | -1.23        | -1.24      |
| mc1r     | -1.13        | -0.80      |
| npas4    | -2.21        | -2.97      |
| itpkb    | -0.63        | -0.30      |
| fosl1    | 1.79         | 2.71       |
| egfr     | 1.01         | 0.14       |
| cngb3    | -0.88        | -1.05      |
| tnfb     | -2.86        | -1.30      |
| nfkbiaa  | -1.34        | -0.73      |
| ftr53    | -1.41        | -0.62      |
| egr4     | -1.47        | -1.80      |
| cyp24a1  | 1.80         | 1.30       |
| gadd45bb | 0.80         | 0.60       |
| socs3b   | 0.70         | 1.00       |
| hmox1a   | 0.90         | 1.00       |
| hsp70l   | 2.50         | 1.50       |
| itgb4    | 1.20         | 0.70       |
| vsig10   | 0.67         | 0.54       |
| itga11a  | 0.37         | 0.71       |
| foxo1a   | 0.46         | 1.08       |
| il6st    | 0.53         | 0.54       |
| mmp9     | 2.20         | 1.80       |
| tgfb1b   | 0.30         | 0.90       |
| g6pca.1  | 0.50         | 1.20       |
| g6pca.2  | 0.46         | 0.90       |

Table S8. Correlation of 41 overlapping genes (GSE46343 vs. RNA-seq)

| Genes          | GSE46343 (logFC) | RNA-seq (logFC) |
|----------------|------------------|-----------------|
| <b>ABCD4</b>   | <b>-2.1</b>      | <b>-0.5</b>     |
| ALDH3B2        | 1.3              | -1.0            |
| <b>ATF3</b>    | <b>2.0</b>       | <b>0.7</b>      |
| <b>ATF6B</b>   | <b>1.2</b>       | <b>0.4</b>      |
| <b>ATG16L2</b> | <b>-1.1</b>      | <b>-1.7</b>     |
| CAV2           | 1.3              | -0.5            |
| CHD3           | 1.3              | -0.6            |
| CPT1B          | -1.2             | 0.6             |
| <b>CYP24A1</b> | <b>1.4</b>       | <b>1.8</b>      |
| EDC4           | -1.3             | 0.5             |
| <b>EGFR</b>    | <b>1.4</b>       | <b>1.1</b>      |
| <b>ENC1</b>    | <b>1</b>         | <b>0.4</b>      |
| <b>ERCC6</b>   | <b>1.1</b>       | <b>1</b>        |
| <b>FASN</b>    | <b>1.7</b>       | <b>0.5</b>      |
| FHOD1          | -1.8             | 0.5             |
| <b>FOSL2</b>   | <b>2.4</b>       | <b>0.4</b>      |
| <b>FRRS1</b>   | <b>2.6</b>       | <b>1.5</b>      |
| GRHL3          | -1.2             | 0.4             |
| <b>HMOX1</b>   | <b>1.1</b>       | <b>0.8</b>      |
| <b>HSPA1I</b>  | <b>1</b>         | <b>2.7</b>      |
| <b>IL6ST</b>   | <b>2.5</b>       | <b>0.5</b>      |
| LIPG           | -1.5             | 0.4             |
| LSM10          | -1.1             | 0.9             |
| <b>MAFF</b>    | <b>1.2</b>       | <b>0.4</b>      |
| MKMK1          | -1.1             | 0.6             |
| <b>MMP13</b>   | <b>1.1</b>       | <b>2.4</b>      |
| <b>NANS</b>    | <b>-1.3</b>      | <b>-0.3</b>     |
| NISCH          | -1.1             | 0.5             |
| NRF1           | -1.2             | 0.7             |
| <b>NUDT1</b>   | <b>-1.2</b>      | <b>-0.8</b>     |
| <b>NUDT13</b>  | <b>-1.5</b>      | <b>-0.9</b>     |
| <b>PIH1D1</b>  | <b>-1.2</b>      | <b>-0.7</b>     |
| PIR            | -1.0             | 0.4             |
| <b>RALGPS2</b> | <b>2.2</b>       | <b>0.8</b>      |
| SLC23A2        | -1.1             | 0.7             |
| SORBS3         | 1.8              | -0.5            |
| TSPO           | -1.4             | 0.4             |
| <b>VSIG10</b>  | <b>1.2</b>       | <b>0.7</b>      |
| XPC            | -1.5             | 0.6             |
| ZNF574         | -1.4             | 0.8             |
| <b>ZNF692</b>  | <b>-1.5</b>      | <b>-1.8</b>     |

note: bolded are correlated/congruent genes used for functional clustering analysis
